# Supplementary material for: Transformable fluorescent nanoparticles (TFNs) of amphiphilic block copolymers for visual detection of aromatic amines in water
Source: Royal Society of Chemistry journal article supplement (doi:10.1039/d1py00919b), 2021-01-01
Supplement: d1py00919b1.pdf [file d1py00919b1.pdf]

**Supporting Information**

**Transformable fluorescent nanoparticles (TFNs) of amphiphilic block copolymers  
for visual detection of aromatic amines in water**

*Yuhan Cui, Yusheng Zhou, Guodong Liang\**

*PCFM lab, School of Materials Science and Engineering, Sun Yat-sen University,  
Guangzhou, 510275, China.*

**\*Corresponding Author**

Guodong Liang

PCFM lab, School of Materials Science and Engineering, Sun Yat-sen University,  
Guangzhou 510275, China. [orcid.org/0000-0001-9103-4545](https://orcid.org/0000-0001-9103-4545); E-mail:  
[lgedong@mail.sysu.edu.cn](mailto:lgedong@mail.sysu.edu.cn) (G. L.).

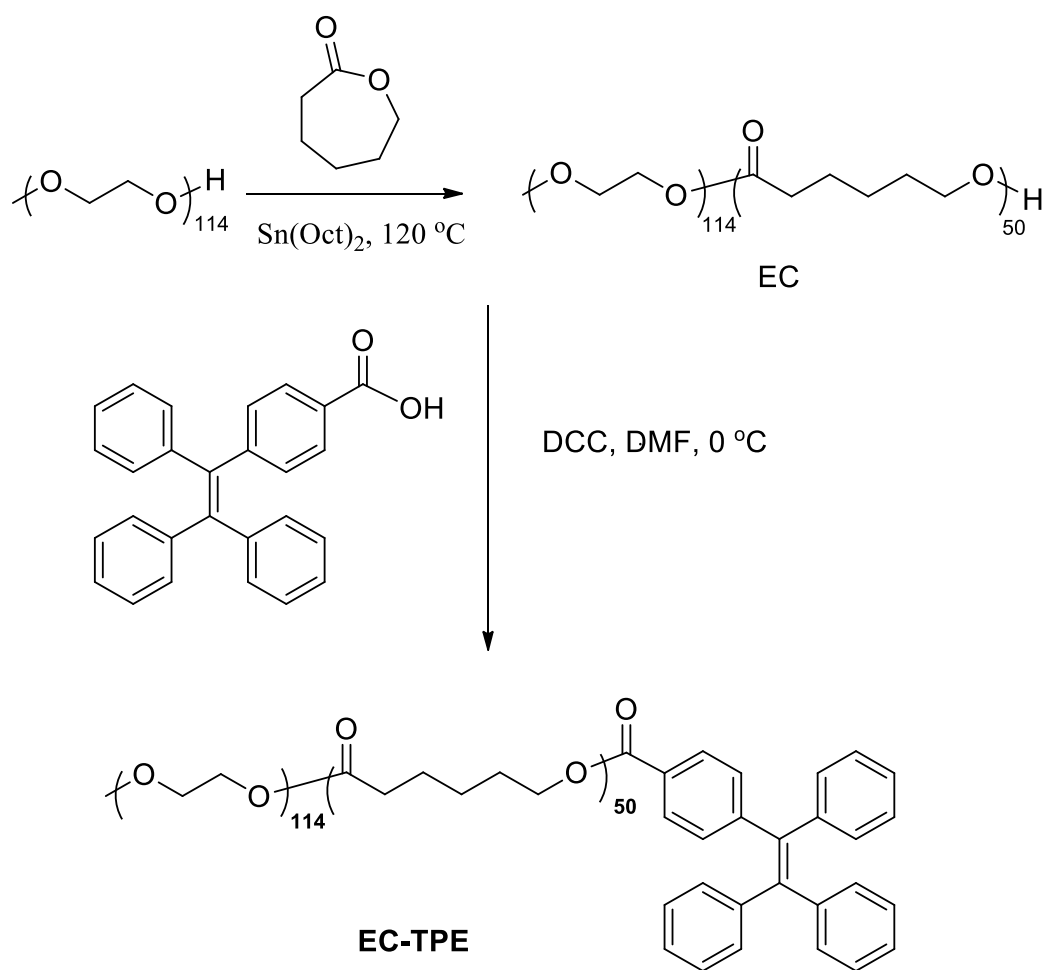

**Scheme S1** Synthetic route for poly(ethylene glycol)-block-poly(caprolactone) mono-terminated with tetraphenylethene (EC-TPE).

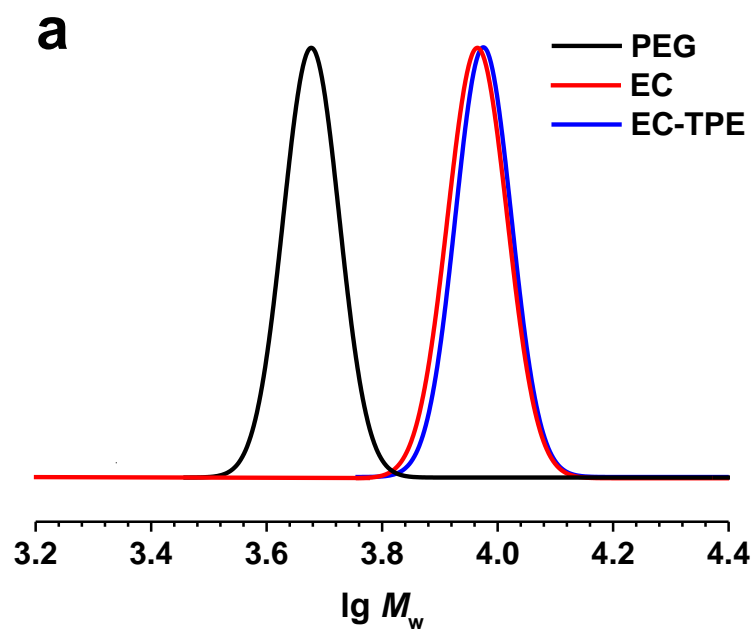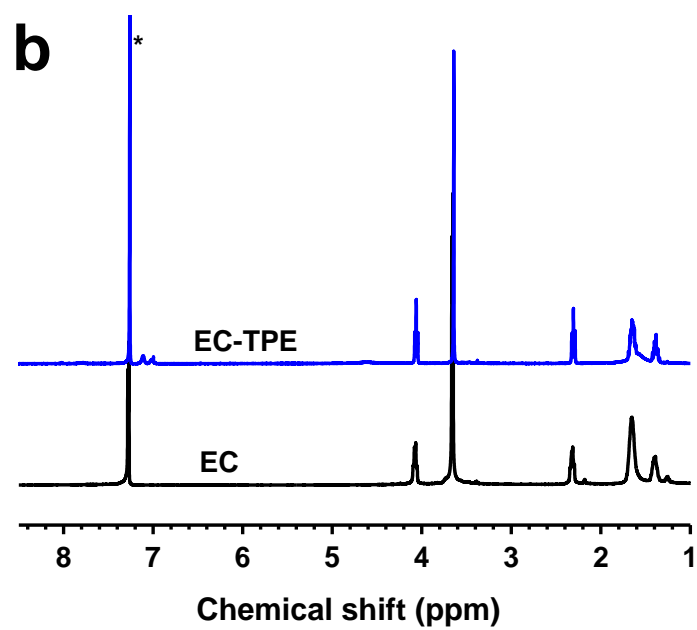

**Fig. S1** (a) GPC traces of PEG, EC, and EC-TPE. (b)  $^1\text{H}$  NMR spectra of EC-TPE using  $\text{CDCl}_3$  as solvent. The solvent peak was marked with an asterisk.

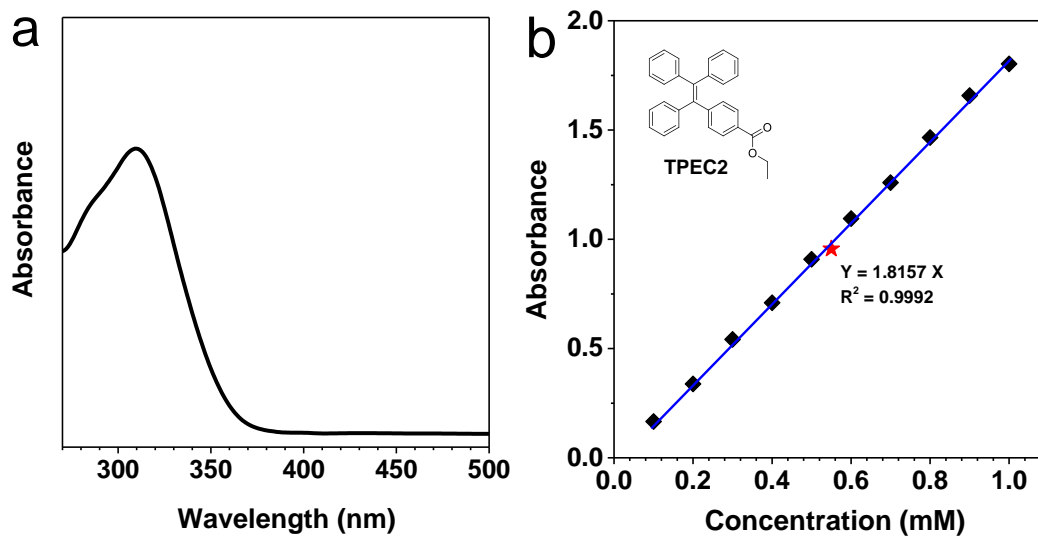

**Fig. S2** (a) UV-vis spectrum of EC-TPE in THF (0.55 mM). (b) Plot of absorbance (312 nm) of TPEC2 in THF against TPEC2 concentration.

### Calculation of the weight fraction of TPE in polymer based on $^1\text{H}$ NMR

The weight fraction of TPE ( $W_{\text{TPE}}$ ) in the polymer was calculated as follows:

$$\begin{aligned}
 W_{\text{TPE}} &= M_{\text{TPE}}/M_{\text{polymer}} \times 100\% \\
 &= (331 \text{ g mol}^{-1}) / (11100 \text{ g mol}^{-1}) \\
 &= 3.0 \text{ wt}\%.
 \end{aligned}$$

### Calculation of the weight fraction of TPE in polymer using UV-vis spectra

The weight fraction of TPE molecules in polymer practically was calculated using the following formula:

$$W_{\text{TPE}} = A M_{\text{TPEC2}} / K / C / M_{\text{polymer}}$$

$$= 0.956 \times 404 \text{ g/mol} / (1.8157 \text{ L/mmol}) / 0.55 \text{ mM} / (11100 \text{ g/mol})$$

$$= 3.5 \text{ wt\%}.$$

$M_{\text{TPEC2}}$  and  $M_{\text{polymer}}$  are molecular weight of TPEC2 (404 g/mol) and EC-TPE (11100 g/mol), respectively.  $A$  is absorbance of EC-TPE/THF solution at 312 nm.  $K$  is the slope of calibration curve (1.8157 L/mmol, Fig. 5b).  $C$  is the concentration of EC-TPE/THF solutions.

The weight fraction of TPE in the polymer determined using UV-vis spectra (3.5 wt%) is close to that by  $^1\text{H}$  NMR (3.0 wt%).

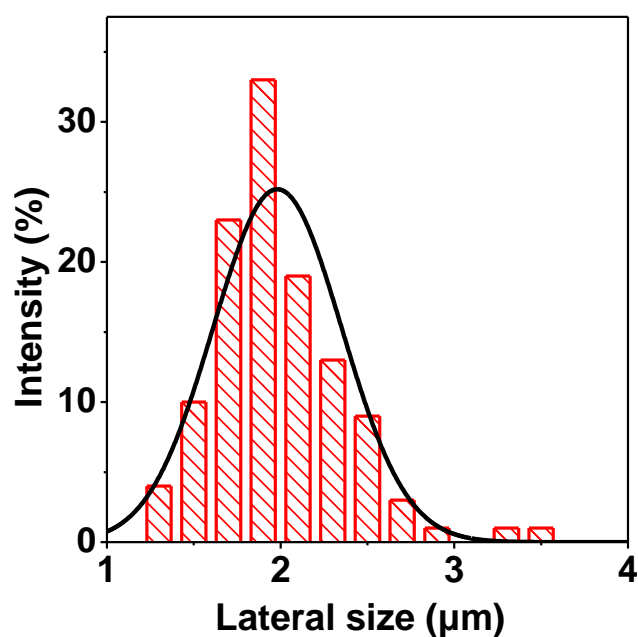

**Fig. S3** Size distribution of EC-TPE nano-sheets in SEM images (about 50 nano-sheets were analysed).

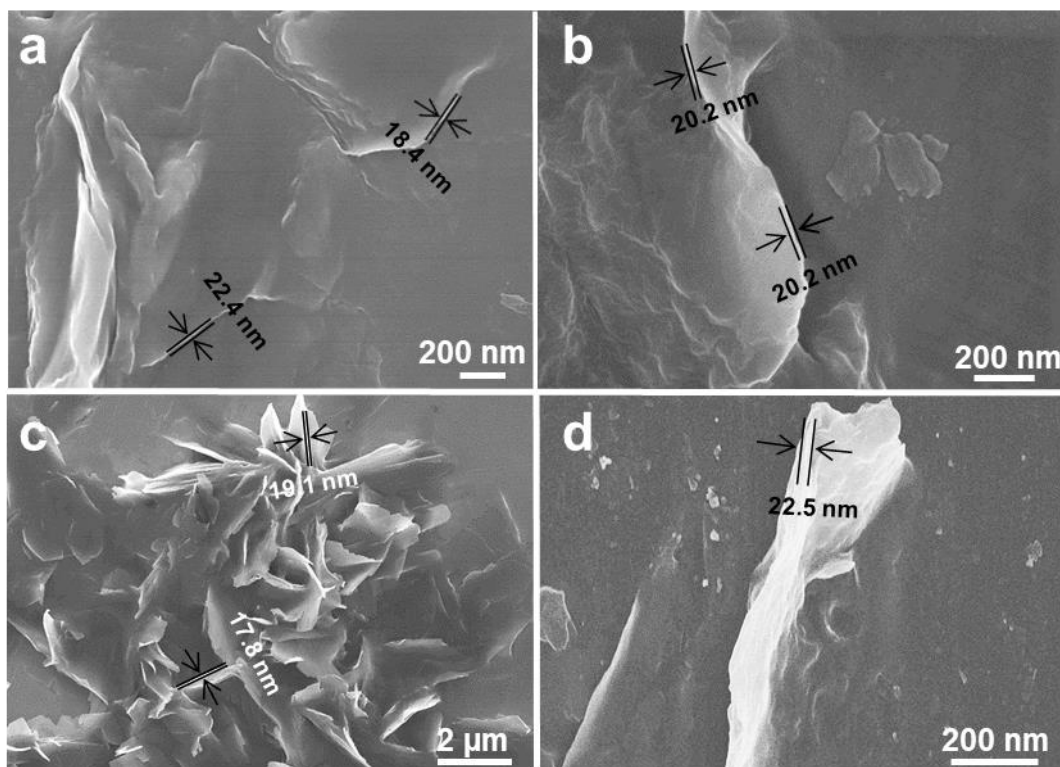

**Fig. S4** Scanning electron microscopy (SEM) images of EC-TPE nano-sheets.

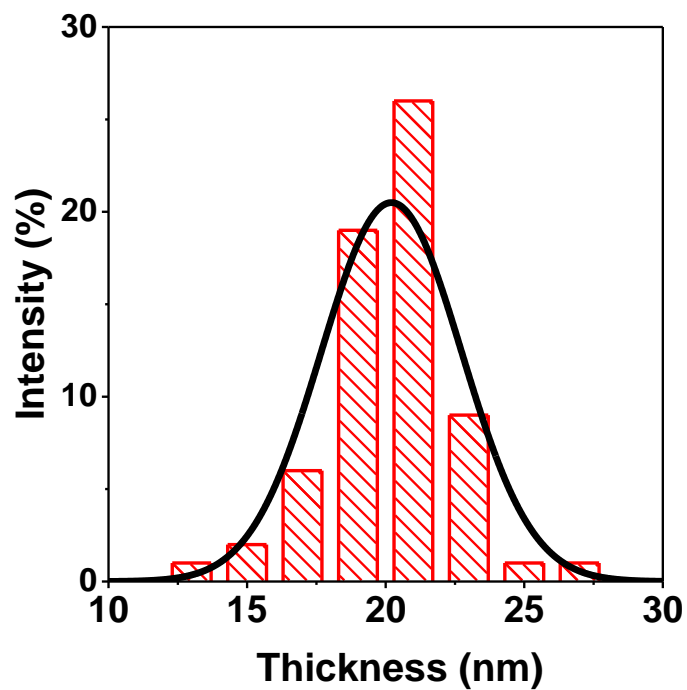

**Fig. S5** Thickness distribution of EC-TPE nano-sheets in SEM images. About 65 nano-sheets were analysed.

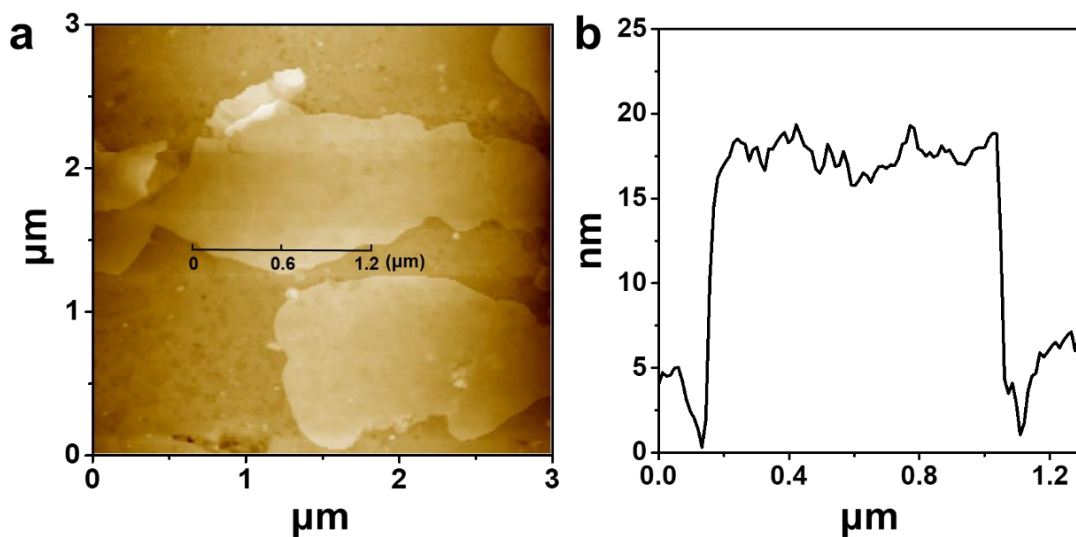

**Fig. S6** Tapping mode atomic force microscope (AFM) height images (a) and the cross-sectional profile (b) of EC-TPE nano-sheets.

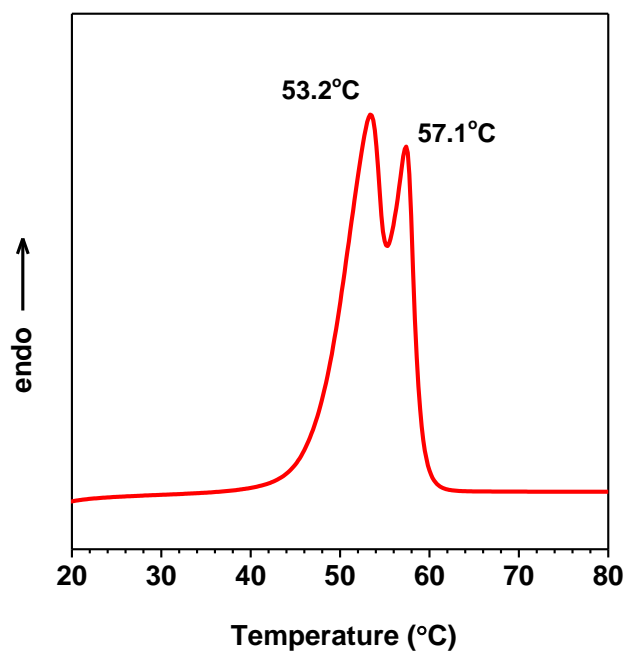

**Fig. S7** DSC heating traces of EC-TPE.

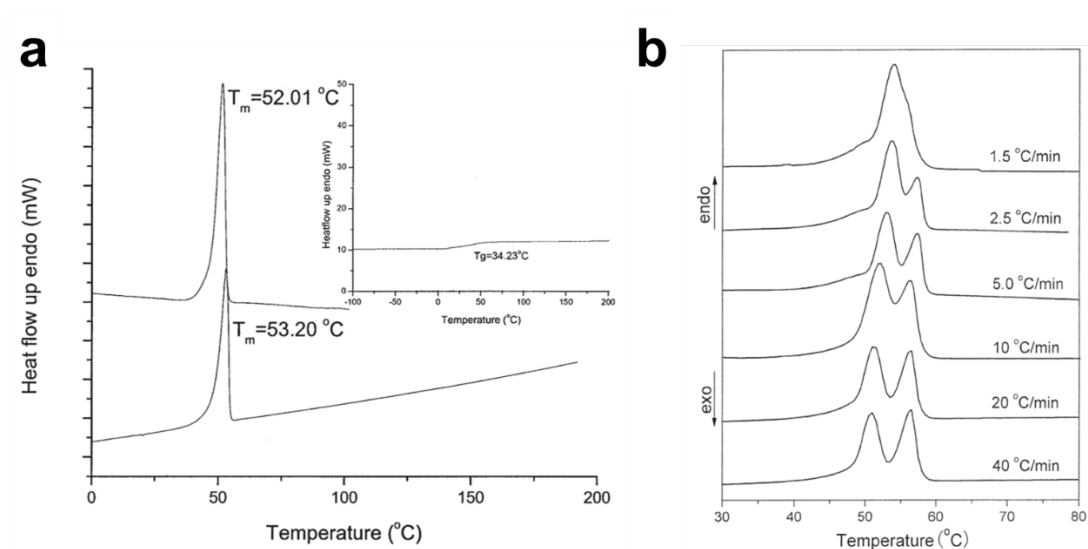

**Fig. S8** (a) DSC heating scans of PEG ( $M_n=5000$  g/mol) reported in reference.<sup>1</sup> (b) DSC heating scans of PCL-PEG-PCL triblock copolymers reported in reference.<sup>2</sup>

### Calculation of folding number of PCL

The length of fully extended polycaprolactone (PCL) chains was estimated to be  $0.86 \cdot DP$  nm using ChemDraw 7.5 (DP was the number of repeating units of PCL).

The folding number of PCL in EC-TPE was determined to be the integer of  $0.86 \cdot DP/l - 1$ , where  $l$  was the thickness of EC-TPE lamellae.

### Calculation of the aggregation number of EC-TPE nano-sheets

Based on the lamellar morphology EC-TPE micelles, the aggregation number,  $N$ , of EC-TPE micelles were estimated from the following formula:

$$N = N_A \cdot d \cdot V / M$$



where  $N_A$  is Avogadro's number ( $6.02 \times 10^{23}$ ),  $M$  is molecular weight of EC-TPE (11,100 g/mol),  $d$  is density of EC-TPE, estimated using  $d = W_{TPE} \cdot d_{TPE} + W_{PCL} \cdot d_{PCL} + W_{PEG} \cdot d_{PEG} = (331 \times 1/11100) \times 1.088 \text{ g/cm}^3 + (5700/11100) \times 1.145 \text{ g/cm}^3 + 5000/11100 \times 1.270 \text{ g/cm}^3 = 1.192 \text{ g/cm}^3$ . ( $d_{PCL}$  is density of PCL, 1.145 g/cm<sup>3</sup>, <http://en.wikipedia.org/wiki/Polycaprolactone>.  $d_{TPE}$  is density of TPE, 1.088 g/cm<sup>3</sup>, <http://en.wikipedia.org/wiki/Tetraphenylethylene>.  $d_{PEG}$  is density of TPE, 1.270 g/cm<sup>3</sup>, [http://en.wikipedia.org/wiki/Polyethylene glycol](http://en.wikipedia.org/wiki/Polyethylene_glycol)).  $W$  is weight fraction of TPE, PCL and PEG respectively.  $V$  is volume of each micelle, calculated using  $V = A^2 H$  ( $A$  is the side length of the lamellar, 2000 nm.  $H$  is the height the lamellar, 20 nm).

$$N = N_A \cdot d \cdot V / M$$

$$= 6.02 \times 10^{23} / \text{mol} \times 1.192 \text{ g/cm}^3 \times 2000 \times 2000 \times 20 \times (10^{-7})^3 \text{ cm}^3 / (11100 \text{ g/mol})$$

$$= 5.2 \times 10^6$$

### **Calculation of the aggregation number of EC-TPE nano-spheres**

Based on the spherical morphology EC-TPE micelles, the aggregation number,  $N$ , of EC-TPE micelles were estimated from the following formula:

$$N = N_A \cdot d \cdot V / M$$

where  $N_A$  is Avogadro's number ( $6.02 \times 10^{23}$ ),  $M$  is molecular weight of EC-TPE (11,100 g/mol),  $d$  is density of EC-TPE, estimated using  $d = W_{TPE} \cdot d_{TPE} + W_{PCL} \cdot d_{PCL} + W_{PEG} \cdot d_{PEG} = (331 \times 1/11100) \times 1.088 \text{ g/cm}^3 + (5700/11100) \times 1.145 \text{ g/cm}^3 + 5000/11100 \times 1.270 \text{ g/cm}^3 = 1.192 \text{ g/cm}^3$ . ( $d_{PCL}$  is density of PCL, 1.145 g/cm<sup>3</sup>,

<http://en.wikipedia.org/wiki/Polycaprolactone>.  $d_{\text{TPE}}$  is density of TPE,  $1.088 \text{ g/cm}^3$ ,  
<http://en.wikipedia.org/wiki/Tetraphenylethylene>.  $d_{\text{PEG}}$  is density of TPE,  $1.270 \text{ g/cm}^3$ ,  
[http://en.wikipedia.org/wiki/Polyethylene\\_glycol](http://en.wikipedia.org/wiki/Polyethylene_glycol)).  $W$  is weight fraction of TPE, PCL  
and PEG respectively.  $V$  is volume of each micelle, calculated using  $V=4/3\pi(D/2)^3$  ( $D$   
is diameter of the micelle,  $66 \text{ nm}$ ).

$$N=N_A \cdot d \cdot V/M$$

$$=6.02 \times 10^{23} / \text{mol} \times 1.192 \text{ g/cm}^3 \times 4/3\pi \times (66/2 \times 10^{-7} \text{ cm})^3 / (11100 \text{ g/mol})$$

$$=9.8 \times 10^3$$

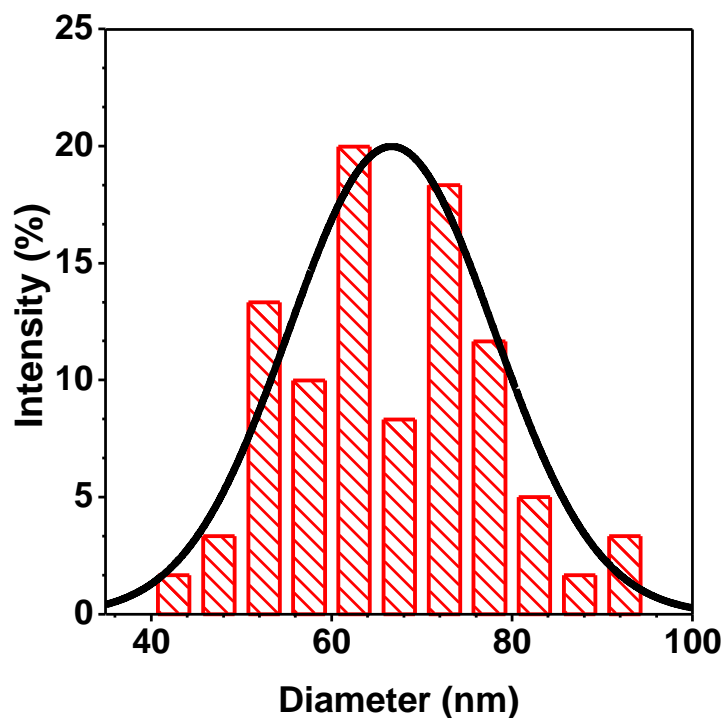

**Fig. S9** Diameter distribution of EC-TPE nanoparticles in SEM and TEM images.

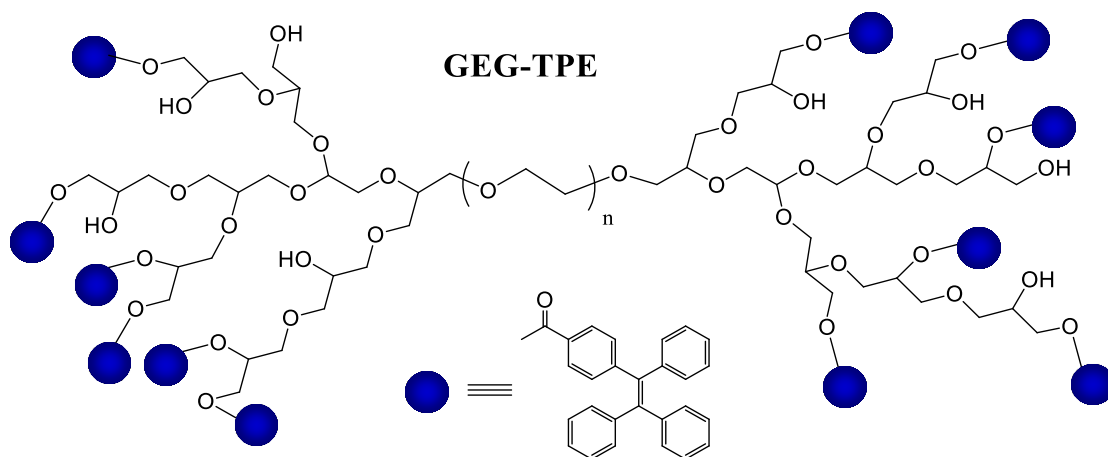

**Scheme S2** Chemical structure of GEG-TPE.

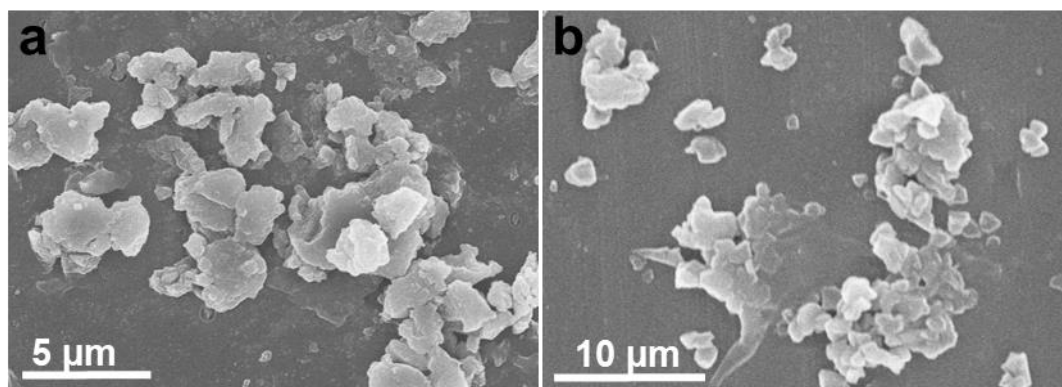

**Fig. S10** Scanning electron microscopy (SEM) images of (a) EC/TPE blends and (b) TPE aggregates in water.

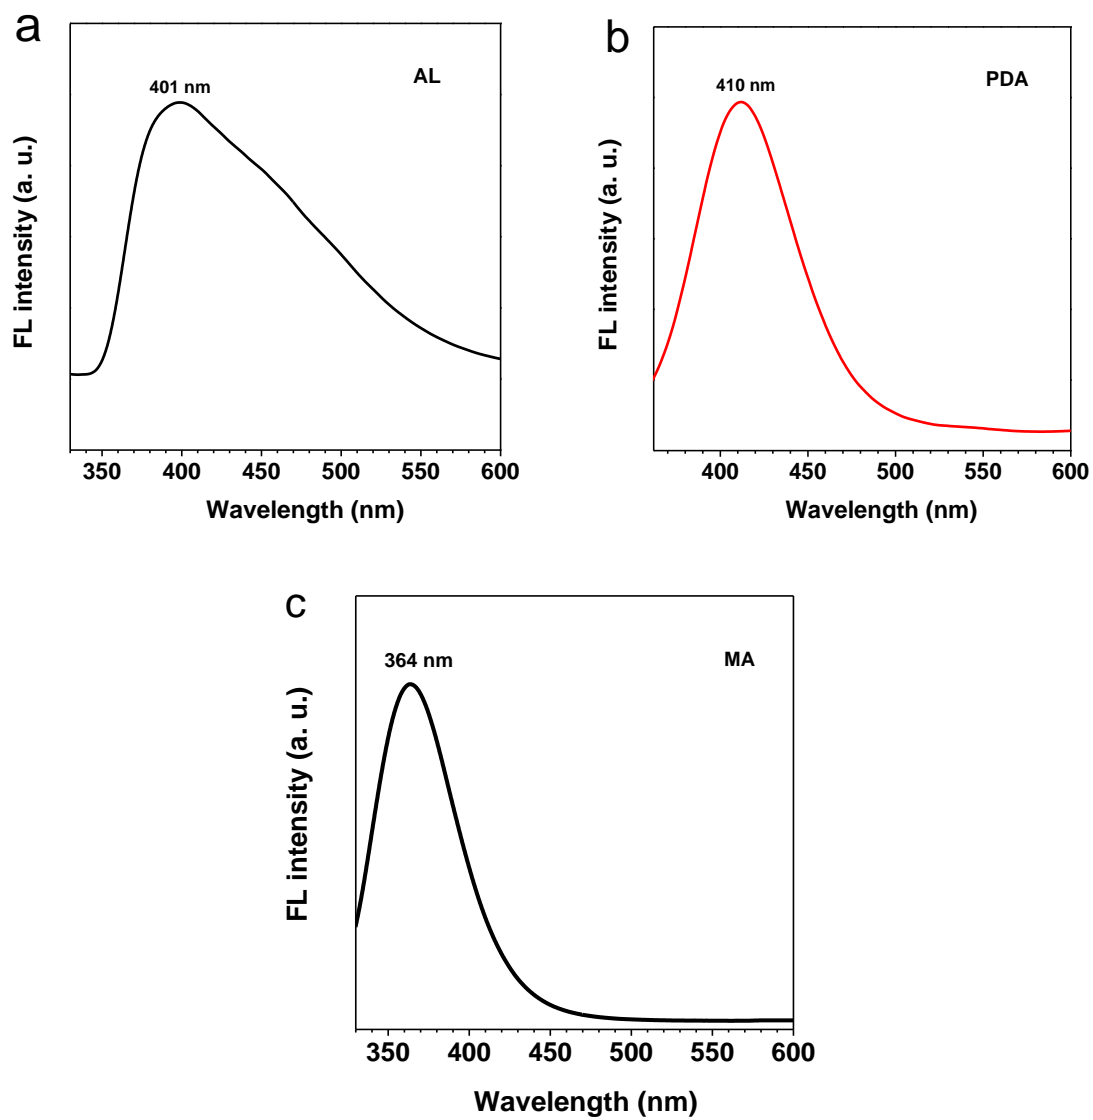

**Fig. S11** Fluorescence spectra of AL (a), PDA (b) and MA (c) in water. Concentration: 1 mM. Excitation: 310 nm.

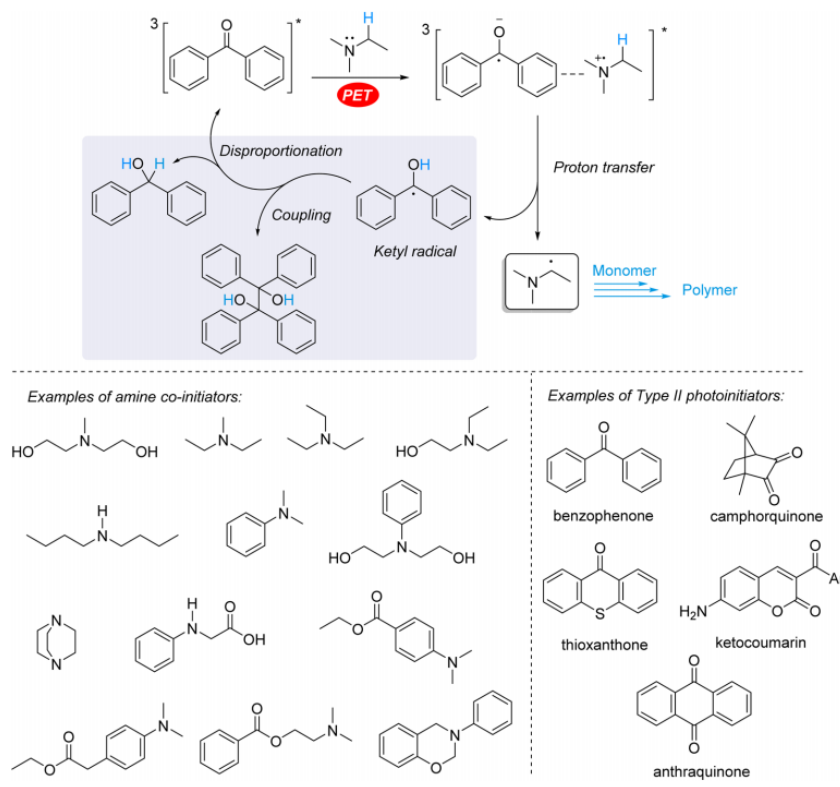

**Scheme S3** Schematic representation of a photoinitiation with benzophenone as an example of ketone-based photoinitiator and a tertiary amine co-initiator.<sup>3</sup>

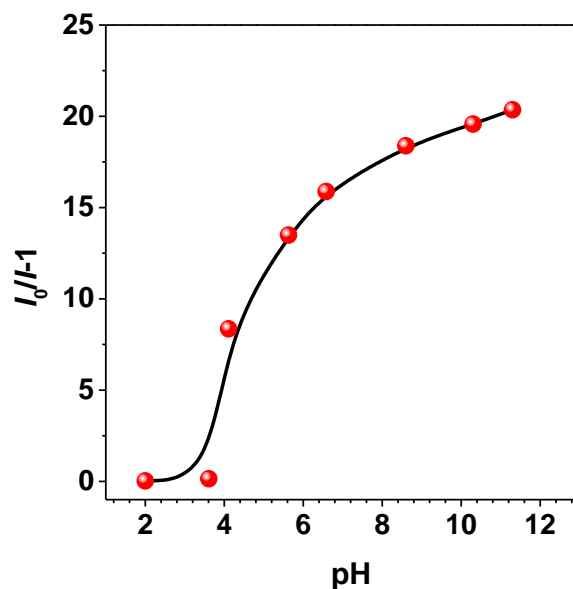

**Fig. S12** Fluorescence response of EC-TPE nanosheets to AL at various pH. EC-TPE concentration: 0.1 mg/mL, AL concentration: 10 mg/L.

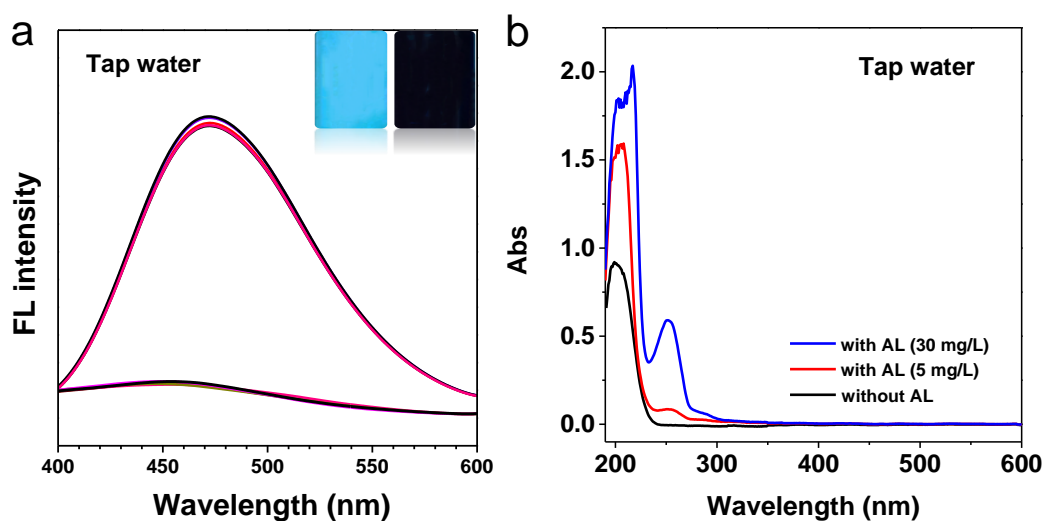

**Fig. S13** Detection of AL in tap water. (a) Fluorescence spectra of EC-TPE nano-sheet aqueous suspensions in the absence and presence of AL (5 mg/L). (b) UV-vis spectra of tap water in the absence and presence of AL.

Tap water was taken in our laboratory and used without further purification.

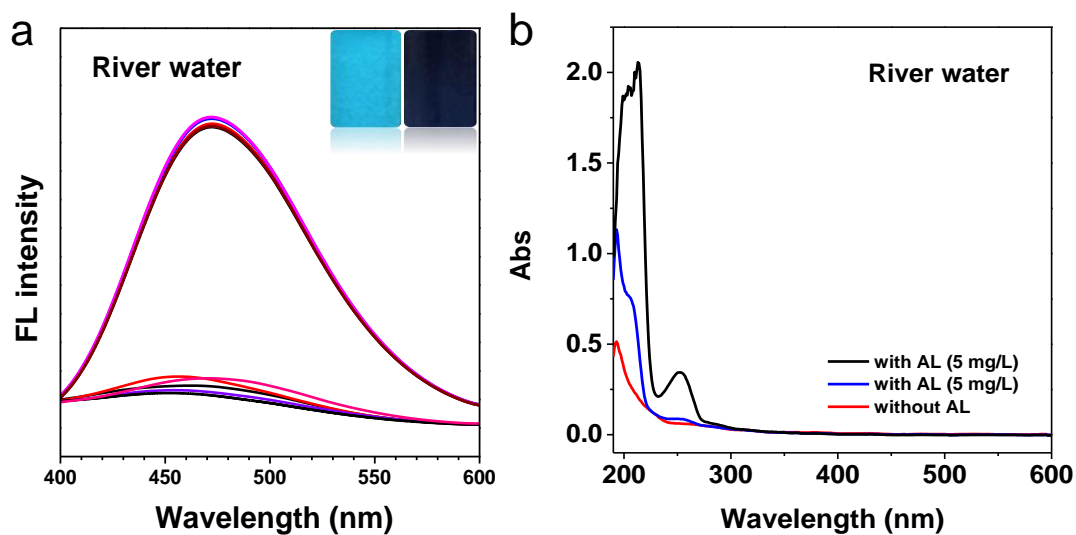

**Fig. S14** Detection of AL in river water. (a) Fluorescence spectra of EC-TPE nano-sheets aqueous suspensions in the absence and presence of AL (5 mg/L). (b) UV-vis spectra of river water in the absence and presence of AL.

The river water was taken from Pearl River (Zhongda dock) and passed through a filter of 220 nm to remove insoluble impurities.

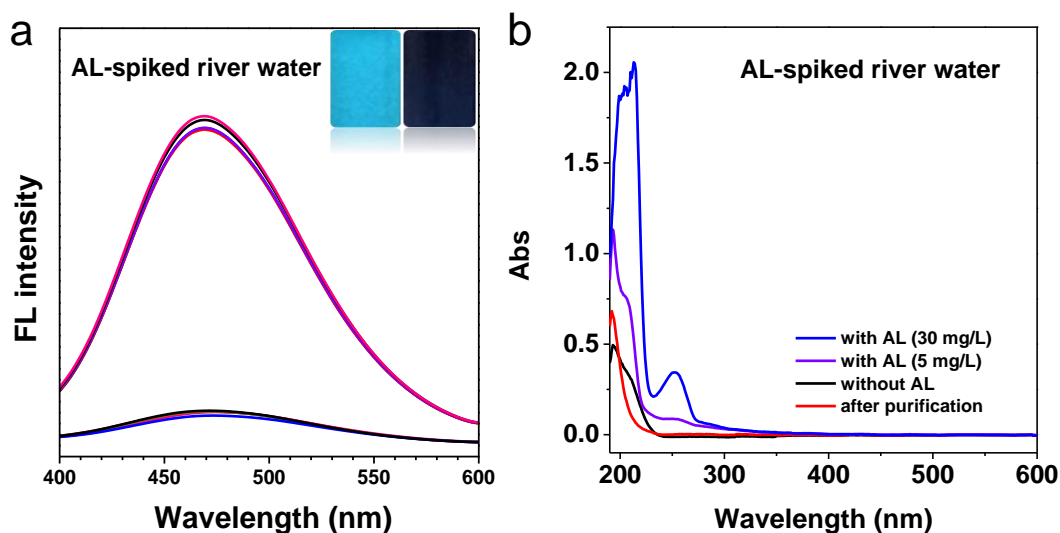

**Fig. S15** Detection of AL in river water. (a) Fluorescence spectra of EC-TPE nano-sheets aqueous suspensions in the absence and presence of AL (5 mg/L). (b) UV-vis spectra of river water before and after purification using activated carbon.

The AL-spiked river water was used as simulated polluted water for AL detection. the AL-spiked river water was purified using activated carbon to remove AL but leave salt ions in the solution for preparation of reference samples. 10 mL of AL-spiked river water was added 2 g of activated carbon powder. The mixture was stirred for 10 min. The activated carbon powders were filtered off. The filtrate was used to prepare reference samples.



## Notes and references

1. F. Hua, X. Yang, B. Gong and E. Ruckenstein, *J Polym Sci Pol Chem*, 2005, **43**, 1119-1128.
2. Z. Wei, F. Yu, G. Chen, C. Qu, P. Wang, W. Zhang, J. Liang, M. Qi and L. Liu, *J Appl Polym Sci*, 2009, **114**, 1133-1140.
3. S. Dadashi-Silab, S. Doran and Y. Yagci, *Chem Rev*, 2016, **116**, 10212-10275.
